# Supplementary material for: COVID-19 vaccine barriers and perception among rural adults: a qualitative study in Bangladesh
Source: PubMed Central journal article supplement — BMJ Open. 2023 Oct 18;13(10):e074357. doi: 10.1136/bmjopen-2023-074357 (PMC10603445; doi:10.1136/bmjopen-2023-074357), 2023-10-18
Supplement: bmjopen-2023-074357supp001.pdf [file bmjopen-2023-074357supp001.pdf]

## **Barriers and perceptions of taking the COVID-19 vaccine among poor Bangladeshi adults: a cross-sectional mixed-methods survey**

### **In-depth interview guidelines**

#### **General Information**

1. Respondent's general information (division, district, age, gender, occupation of both spouses, income, education (if informal education like a scholar or an Islamic scholar, mention that), number of household members, sanitation facilities (water and toilet facilities).

#### **Concept of COVID-19**

2. Have you heard about COVID-19? Where or from whom did you hear about it? What was your initial perception when you first heard about this disease? (Please provide details.) Did the coronavirus have any economic or social impact on your household? (For example: work situation, communication and social barriers with relatives, etc.)
3. What are the symptoms of the coronavirus? (e.g., dry cough, fever, fatigue, sore throat, sneezing, upset stomach, diarrhoea, vomiting, headache, body aches, feeling cold, and breathing difficulties). Did you experience any of these symptoms of COVID-19? (For example: if you experienced symptoms, did you get tested? What were the test results? If you didn't get tested, why not, and what actions did you take if you tested positive?)
4. How does the coronavirus spread? (For example: by shaking hands with an infected person, touching an infected person, being in close proximity to an infected person without any form of contact, through respiratory droplets, not washing hands after using the toilet, touching surfaces in the infected area and then touching the face or nose, or consuming contaminated food.) What preventive measures could be taken to control the spread of this illness?

#### **Perceptions of COVID-19 Vaccination**

1. What were the general perceptions regarding the COVID vaccine? (effectiveness, benefits)

2. Did you have any reactions or side effects after receiving the COVID-19 vaccine? If so, what were they?
3. How did anyone's religious beliefs influence their perception of COVID-19 and the role of vaccines?
4. How did you perceive the role of the government in implementing a nationwide vaccination programme?

### **Misconceptions towards COVID-19 Vaccination**

9. What were the initial concerns about side effects during the vaccination programme? (For example: perception of side effects, specific concerns, fear, religious beliefs, any myths, misinformation.)
10. Is there any specific group of people that you believe should not receive vaccines? (For example: specific age groups, individuals with certain medical conditions, pregnant women)

### **Attitude towards COVID-19 Vaccination**

11. What is your attitude towards the COVID-19 vaccine? Do you believe that the COVID-19 vaccine helps control or prevent the spread of the coronavirus? (For example: why or why not?) Do you know how many doses are required for the COVID-19 vaccination to be effective in controlling the virus? What are your thoughts on the benefits of the COVID-19 vaccination? (For example: mental peace, immunity, social acceptance, physical well-being, etc.)

### **Barriers to COVID-19 Vaccination**

12. Have you received the COVID-19 vaccine? Can you tell me why you chose to get vaccinated or not? (For example: gender/family members' preferences, cost, perceived unnecessaryness, age, non-communicable diseases, vaccine expiration, feeling well without vaccination, short-term efficacy, natural protection against COVID-19, receiving the vaccine from abroad or another country, and pregnancy complications.)

13. Which vaccine does he/she want to take (if no vaccine preference has been mentioned so far)?

### **Opportunities and Benefits of Vaccination, Vaccine Supply, and Management**

14. Did you face any barriers when registering for the vaccine through the website? If yes, what type of barrier was it? (Note: did not have internet access, did not know the procedure for registration, did not receive any SMS, there was a delay in receiving SMS, received one dose but no vaccine supply, the vaccination centre was far from my area, had to roll up the sleeves during vaccine administration, had to stand in a long queue, and Indian vaccine).
15. What are the main barriers to the management of COVID-19 vaccines? (Note: need to go to the hospital, time-consuming, inadequate behaviour of vaccine workers, difficulties for young children and in the workplace, etc.)
16. In order to bring everyone within the ambit of vaccination, what kind of steps do you think the government needs to take? Do you have any recommendations on this matter? If so, please elaborate.
